# Supplementary material
Source: MDPI journal article supplement (https://www.mdpi.com/2073-4395/12/2/375)
Supplement: s1 [file s1]

**Supplementary Materials:**

**Table S1.** Weed species most prevalent in crop rotational sequences evaluated in Wagga Wagga.

| Rank | B-GT-W-<br>GC-B                                    | C-W-B-P-C                                          | GC-GW-<br>GB-GT-GC                     | GW-B-C-<br>GO-GW                       | L-L-L-L-L                              | P-GO-GT-<br>GW-P                       | PM-PM-<br>PM-PM-<br>PM                 | W-C-GO-<br>B-W                         | W-GB-GC-<br>GB-W                       | W-GC-<br>GW-C-W                                    |
|------|----------------------------------------------------|----------------------------------------------------|----------------------------------------|----------------------------------------|----------------------------------------|----------------------------------------|----------------------------------------|----------------------------------------|----------------------------------------|----------------------------------------------------|
| 1    | <i>Sedum</i> spp.                                  | <i>Wahlenbergi</i><br><i>a stricta</i>             | <i>Wahlenbergi</i><br><i>a stricta</i> | <i>Wahlenbergi</i><br><i>a stricta</i> | <i>Sedum</i> spp.                      | <i>Gamochaeta</i><br><i>purpurea</i>   | <i>Sedum</i> spp.                      | <i>Sedum</i> spp.                      | <i>Sedum</i> spp.                      | <i>Sedum</i> spp.                                  |
| 2    | <i>Gamochaeta</i><br><i>purpurea</i>               | <i>Gamochaeta</i><br><i>purpurea</i>               | <i>Gamochaeta</i><br><i>purpurea</i>   | <i>Panicum</i><br>spp.                 | <i>Polygonum</i><br><i>aviculare</i>   | <i>Sedum</i> spp.                      | <i>Wahlenbergi</i><br><i>a stricta</i> | <i>Wahlenbergi</i><br><i>a stricta</i> | <i>Wahlenbergi</i><br><i>a stricta</i> | <i>Wahlenbergi</i><br><i>a stricta</i>             |
| 3    | <i>Wahlenbergi</i><br><i>a stricta</i>             | <i>Sedum</i> spp.                                  | <i>Erigeron</i><br><i>bonariensis</i>  | <i>Crassula</i><br><i>alata</i>        | <i>Wahlenbergi</i><br><i>a stricta</i> | <i>Wahlenbergi</i><br><i>a stricta</i> | <i>Panicum</i><br>spp.                 | <i>Crassula</i><br><i>alata</i>        | <i>Gamochaeta</i><br><i>purpurea</i>   | <i>Erigeron</i><br><i>bonariensis</i>              |
| 4    | <i>Crassula</i><br><i>alata</i>                    | <i>Panicum</i><br>spp.                             | <i>Sedum</i> spp.                      | <i>Sedum</i> spp.                      | <i>Panicum</i><br>spp.                 | <i>Panicum</i><br>spp.                 | <i>Gamochaeta</i><br><i>purpurea</i>   | <i>Panicum</i><br>spp.                 | <i>Panicum</i><br>spp.                 | <i>Panicum</i><br>spp.                             |
| 5    | <i>Erigeron</i><br><i>bonariensis</i>              | <i>Erigeron</i><br><i>bonariensis</i>              | <i>Panicum</i><br>spp.                 | <i>Gamochaeta</i><br><i>purpurea</i>   | <i>Crassula</i><br><i>alata</i>        | <i>Lolium</i><br><i>rigidum</i>        | <i>Arctotheca</i><br><i>calendula</i>  | <i>Gamochaeta</i><br><i>purpurea</i>   | <i>Arctotheca</i><br><i>calendula</i>  | <i>Arctotheca</i><br><i>calendula</i>              |
| 6    | <i>Panicum</i><br>spp.                             | <i>Arctotheca</i><br><i>calendula</i>              | <i>Lolium</i><br><i>rigidum</i>        | <i>Lolium</i><br><i>rigidum</i>        | <i>Erigeron</i><br><i>bonariensis</i>  | <i>Arctotheca</i><br><i>calendula</i>  | <i>Erigeron</i><br><i>bonariensis</i>  | <i>Erigeron</i><br><i>bonariensis</i>  | <i>Crassula</i><br><i>alata</i>        | <i>Lolium</i><br><i>rigidum</i>                    |
| 7    | <i>Lolium</i><br><i>rigidum</i>                    | <i>Crassula</i><br><i>alata</i>                    | <i>Crassula</i><br><i>alata</i>        | <i>Erigeron</i><br><i>bonariensis</i>  | <i>Lolium</i><br><i>rigidum</i>        | <i>Erigeron</i><br><i>bonariensis</i>  | <i>Crassula</i><br><i>alata</i>        | <i>Arctotheca</i><br><i>calendula</i>  | <i>Erigeron</i><br><i>bonariensis</i>  | <i>Polygonum</i><br><i>aviculare</i>               |
| 8    | <i>Arctotheca</i><br><i>calendula</i>              | <i>Sonchus</i><br><i>oleraceus</i>                 | <i>Arctotheca</i><br><i>calendula</i>  | <i>Arctotheca</i><br><i>calendula</i>  | <i>Arctotheca</i><br><i>calendula</i>  | <i>Polygonum</i><br><i>aviculare</i>   | <i>Lolium</i><br><i>rigidum</i>        | <i>Lolium</i><br><i>rigidum</i>        | <i>Chenopodiu</i><br><i>m album</i>    | <i>Gamochaeta</i><br><i>purpurea</i>               |
| 9    | <i>Trifolium</i><br><i>subterraneu</i><br><i>m</i> | <i>Lolium</i><br><i>rigidum</i>                    | <i>Sonchus</i><br><i>oleraceus</i>     | <i>Polygonum</i><br><i>aviculare</i>   | <i>Sonchus</i><br><i>oleraceus</i>     | <i>Fumaria</i><br>spp.                 | <i>Polygonum</i><br><i>aviculare</i>   | <i>Chenopodiu</i><br><i>m album</i>    | <i>Lolium</i><br><i>rigidum</i>        | <i>Crassula</i><br><i>alata</i>                    |
| 10   | <i>Sonchus</i><br><i>oleraceus</i>                 | <i>Trifolium</i><br><i>subterraneu</i><br><i>m</i> | <i>Fumaria</i><br>spp.                 | <i>Sonchus</i><br><i>oleraceus</i>     | <i>Chenopodiu</i><br><i>m album</i>    | <i>Crassula</i><br><i>alata</i>        | <i>Fumaria</i><br>spp.                 | <i>Polygonum</i><br><i>aviculare</i>   | <i>Polygonum</i><br><i>aviculare</i>   | <i>Trifolium</i><br><i>subterraneu</i><br><i>m</i> |

**Table S2.** Weed species most prevalent in crop rotational sequences evaluated in Condobolin.

| Rank | B-C-GO                                | C-GO-B                                | GB-GC-GB                              | GC-GW-C                               | GO-GT-GW                              | GT-W-GC                               | GW-GB-GT                              | L-L-L                                 | W-B-W                                 |
|------|---------------------------------------|---------------------------------------|---------------------------------------|---------------------------------------|---------------------------------------|---------------------------------------|---------------------------------------|---------------------------------------|---------------------------------------|
| 1    | <i>Sedum</i> spp.                     | <i>Crassula alata</i>                 | <i>Sedum</i> spp.                     | <i>Sedum</i> spp.                     | <i>Sedum</i> spp.                     |
| 2    | <i>Crassula alata</i>                 | <i>Sedum</i> spp.                     | <i>Crassula alata</i>                 | <i>Crassula alata</i>                 | <i>Medicago</i><br>spp.               |
| 3    | <i>Lolium rigidum</i>                 | <i>Lolium rigidum</i>                 | <i>Medicago</i> spp.                  | <i>Medicago</i> spp.                  | <i>Lolium rigidum</i>                 | <i>Medicago</i> spp.                  | <i>Panicum</i> spp.                   | <i>Panicum</i> spp.                   | <i>Crassula</i><br><i>alata</i>       |
| 4    | <i>Chenopodium</i><br><i>album</i>    | <i>Panicum</i> spp.                   | <i>Panicum</i> spp.                   | <i>Panicum</i> spp.                   | <i>Conyza</i><br><i>bonariensis</i>   | <i>Panicum</i> spp.                   | <i>Lolium rigidum</i>                 | <i>Lolium</i><br><i>rigidum</i>       | <i>Lolium</i><br><i>rigidum</i>       |
| 5    | <i>Panicum</i> spp.                   | <i>Fumaria</i> spp.                   | <i>Wahlenbergia</i><br><i>stricta</i> | <i>Chenopodium</i><br><i>album</i>    | <i>Medicago</i> spp.                  | <i>Chenopodium</i><br><i>album</i>    | <i>Chenopodium</i><br><i>album</i>    | <i>Conyza</i><br><i>bonariensis</i>   | <i>Wahlenbergia</i><br><i>stricta</i> |
| 6    | <i>Wahlenbergia</i><br><i>stricta</i> | <i>Medicago</i> spp.                  | <i>Lolium rigidum</i>                 | <i>Lolium rigidum</i>                 | <i>Panicum</i> spp.                   | <i>Lolium rigidum</i>                 | <i>Wahlenbergia</i><br><i>stricta</i> | <i>Chenopodium</i><br><i>album</i>    | <i>Panicum</i> spp.                   |
| 7    | <i>Conyza</i><br><i>bonariensis</i>   | <i>Conyza</i><br><i>bonariensis</i>   | <i>Fumaria</i> spp.                   | <i>Conyza</i><br><i>bonariensis</i>   | <i>Wahlenbergia</i><br><i>stricta</i> | <i>Conyza</i><br><i>bonariensis</i>   | <i>Medicago</i> spp.                  | <i>Wahlenbergia</i><br><i>stricta</i> | <i>Chenopodium</i><br><i>album</i>    |
| 8    | <i>Fumaria</i> spp.                   | <i>Chenopodium</i><br><i>album</i>    | <i>Conyza bonariensis</i>             | <i>Wahlenbergia</i><br><i>stricta</i> | <i>Hordeum</i><br><i>glaucum</i>      | <i>Wahlenbergia</i><br><i>stricta</i> | <i>Conyza</i><br><i>bonariensis</i>   | <i>Sonchus</i> spp.                   | <i>Conyza</i><br><i>bonariensis</i>   |
| 9    | <i>Sonchus</i> spp.                   | <i>Wahlenbergia</i><br><i>stricta</i> | <i>Chenopodium</i><br><i>album</i>    | <i>Fumaria</i> spp.                   | <i>Chenopodium</i><br><i>album</i>    | <i>Hordeum</i><br><i>glaucum</i>      | <i>Sonchus</i> spp.                   | <i>Medicago</i> spp.                  | <i>Sonchus</i> spp.                   |
| 10   | <i>Hordeum</i><br><i>glaucum</i>      | <i>Sonchus</i> spp.                   | <i>Sonchus</i> spp.                   | <i>Sonchus</i> spp.                   | <i>Fumaria</i> spp.                   | <i>Fumaria</i> spp.                   | <i>Hordeum</i><br><i>glaucum</i>      | <i>Hordeum</i><br><i>glaucum</i>      | <i>Hordeum</i><br><i>glaucum</i>      |

**Table S3:** Weed species diversity (Shannon–Weiner diversity index) in soil samples collected from cereal and pasture rotations established in Wagga Wagga and Condobolin at experimental initiation and completion of the rotational sequence.

| <b>Wagga Wagga</b>              |             |   |             | <b>Condobolin</b>               |             |   |             |
|---------------------------------|-------------|---|-------------|---------------------------------|-------------|---|-------------|
| <b>Crop rotational sequence</b> | <b>2014</b> |   | <b>2018</b> | <b>Crop rotational sequence</b> | <b>2015</b> |   | <b>2017</b> |
| B-GT-W-GC-B                     | 0.9197      | A | 1.265 AB    | GT-W-GC                         | 0.5781      | A | 0.5131 A    |
| C-W-B-P-C                       | 0.803       | A | 1.085 AB    | B-C-GO                          | 0.5438      | A | 0.5199 A    |
| GC-GW-GB-GT-GC                  | 0.9388      | A | 1.397 A     | GW-GB-GT                        | 0.5302      | A | 0.5302 A    |
| GW-B-C-GO-GW                    | 0.953       | A | 1.135 AB    | GO-GT-GW                        | 0.5175      | A | 0.5377 A    |
| P-GO-GT-GW-P                    | 0.8473      | A | 1.056 AB    | C-GO-B                          | 0.4769      | A | 0.5147 A    |
| W-C-GO-B-W                      | NA          |   | 1.259 AB    | GC-GW-C                         | 0.4476      | A | 0.533 A     |
| W-GB-GC-GB-W                    | NA          |   | 1.033 AB    | GB-GC-GB                        | 0.4035      | A | 0.4866 A    |
| W-GC-GW-C-W                     | 0.8538      | A | 0.866 AB    | W-B-W                           | 0.3804      | A | 0.5477 A    |
| PM-PM-PM-PM-PM                  | 0.8609      | A | 0.674 B     | L-L-L                           | 0.2853      | A | 0.5196 A    |
| L-L-L-L-L                       | 1.0684      | A | 0.886 AB    |                                 |             |   |             |

Propagule density reflects combined sowing and harvest time soil samples in each treatment and time point with n=16.

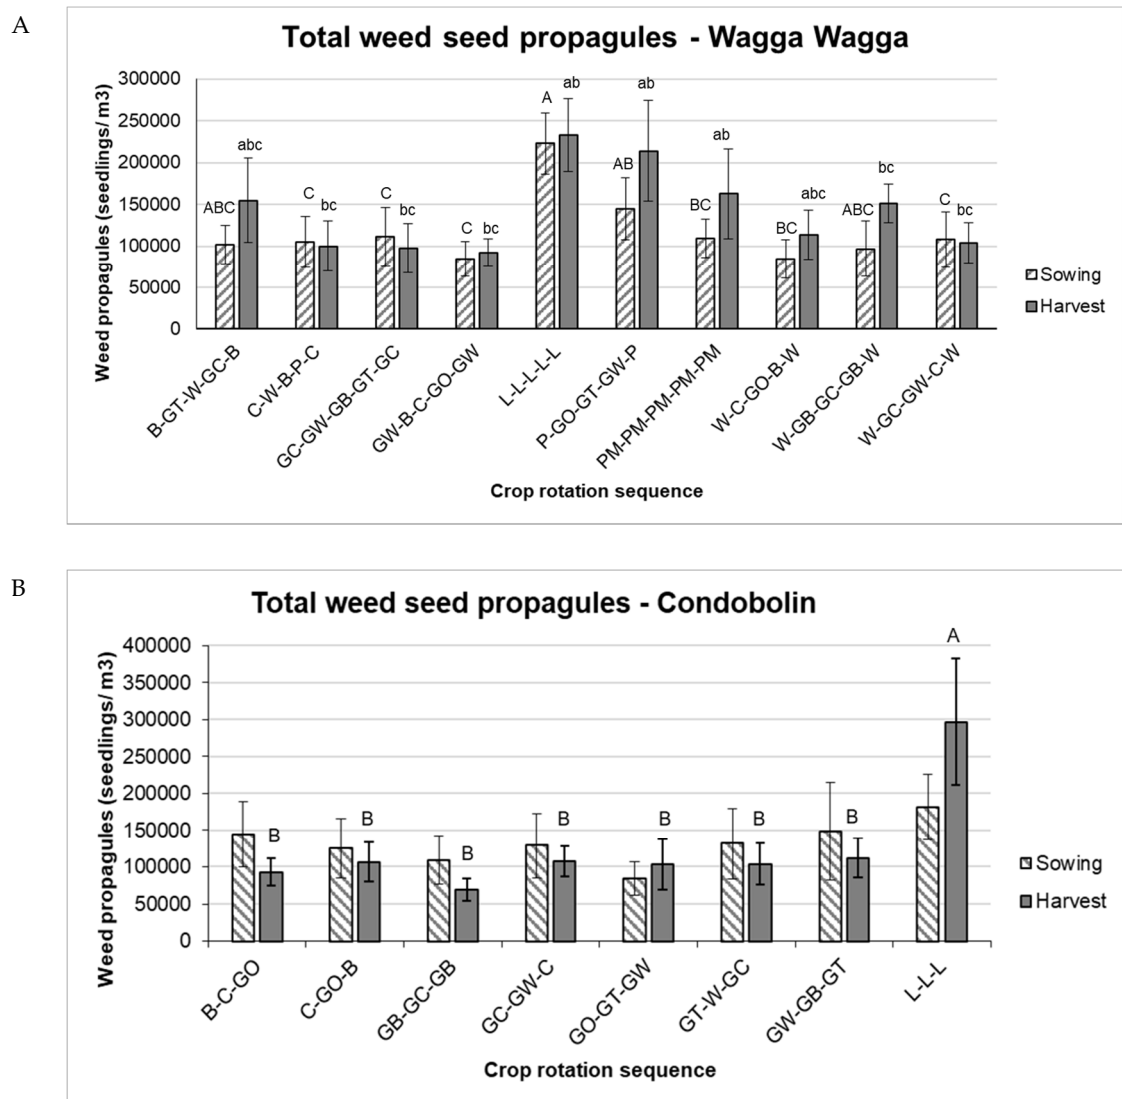

**Figure S1.** Weed propagule numbers obtained in rotational cropping treatments from 2014-2018 in Wagga Wagga and 2015-2017 in Condobolin, NSW.
